# Supplementary material
Source: PubMed Central journal article supplement (PMC3230930)
Supplement: NIHMS326785-supplement-01.pdf [file NIHMS326785-supplement-01.pdf]

**Table S1. Coordinates of the Injection Sites and Behavioral Responses for the ChR2-Expressing Animals shown in Figure 3C**

| <b>Animal Number</b> | <b>Distance from the Bregma (mm)</b> | <b>Distance from ventral surface (mm)</b> | <b>% Flight behavior</b> |
|----------------------|--------------------------------------|-------------------------------------------|--------------------------|
| 1                    | 1.96                                 | 1                                         | 100%                     |
| 2                    | -0.1                                 | 0.75                                      | 85.71%                   |
| 3                    | -0.1                                 | 1                                         | 100%                     |
| 4                    | -0.22                                | 1                                         | 100%                     |
| 5                    | -0.46                                | 0.75                                      | 100%                     |
| 6                    | -0.46                                | 0.5                                       | 100%                     |
| 7                    | -0.46                                | 0.65                                      | 100%                     |
| 8                    | -0.56                                | 0.5                                       | 100%                     |
| 9                    | -0.56                                | 0.75                                      | 100%                     |
| 10                   | -0.58                                | 1                                         | 85.71%                   |
| 11                   | -0.58                                | 0.5                                       | 42.86%                   |
| 12                   | -0.7                                 | 0.7                                       | 100%                     |
| 13                   | -0.7                                 | 0.5                                       | 85.71%                   |
| 14                   | -0.7                                 | 1                                         | 100%                     |
| 15                   | -1.18                                | 1                                         | 100%                     |
| 16                   | -1.58                                | 1                                         | 100%                     |
| 17                   | -1.86                                | 1                                         | 100%                     |
| 18                   | -2.5                                 | 0.75                                      | 100%                     |

The animals are listed in the order of Bregma position of the injections sites. A subset of these animals with sparsely labeled ChR-expressing neurons at the injection sites are included in the Figure 2B (Dual Virus).
